# Supplementary material for: Anxiety, Depression and Post Traumatic Stress Disorder after critical illness: a UK-wide prospective cohort study
Source: PubMed Central journal article supplement (PMC6251214; doi:10.1186/s13054-018-2223-6), 2018-11-23
Supplement: 13054_2018_2223_MOESM4_ESM.pdf [file 13054_2018_2223_MOESM4_ESM.pdf]

### HADS Anxiety 3 Months

n=4726

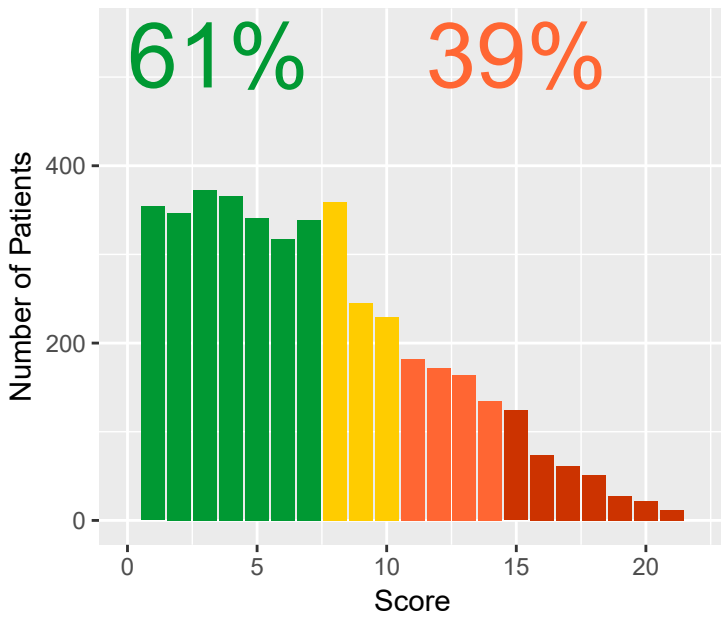

### HADS Anxiety 12 Months

n=3489

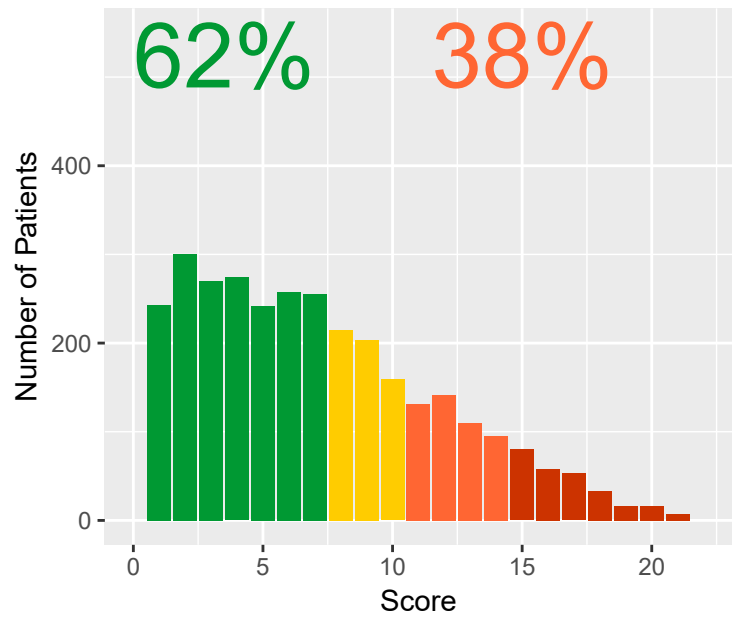

### HADS Depression 3 Months

n=4733

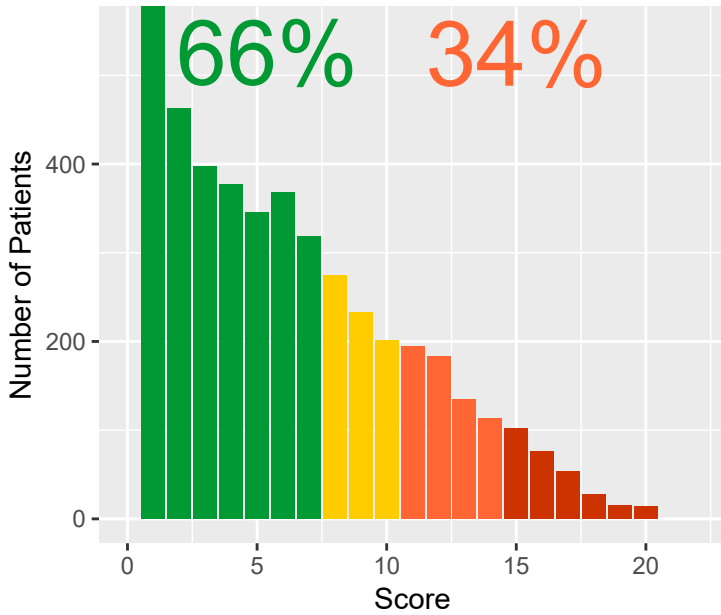

### HADS Depression 12 Months

n=3497

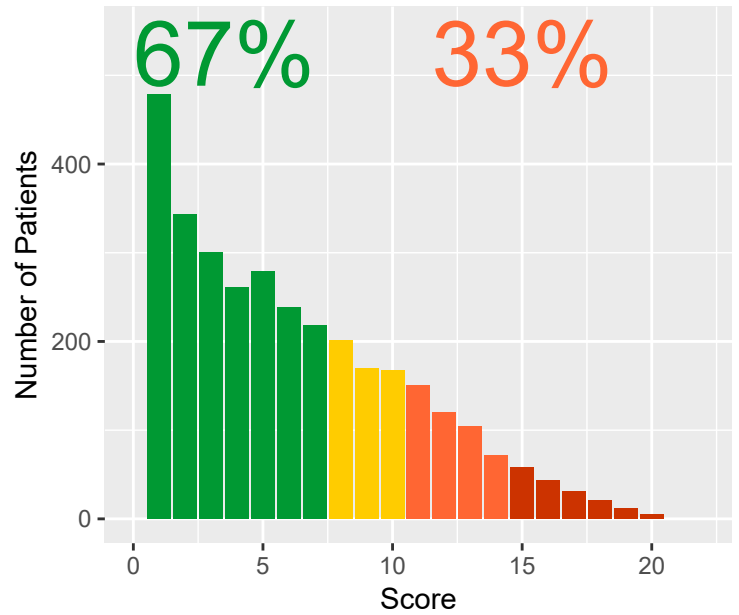

### PCL-C 3 Months

n=4601

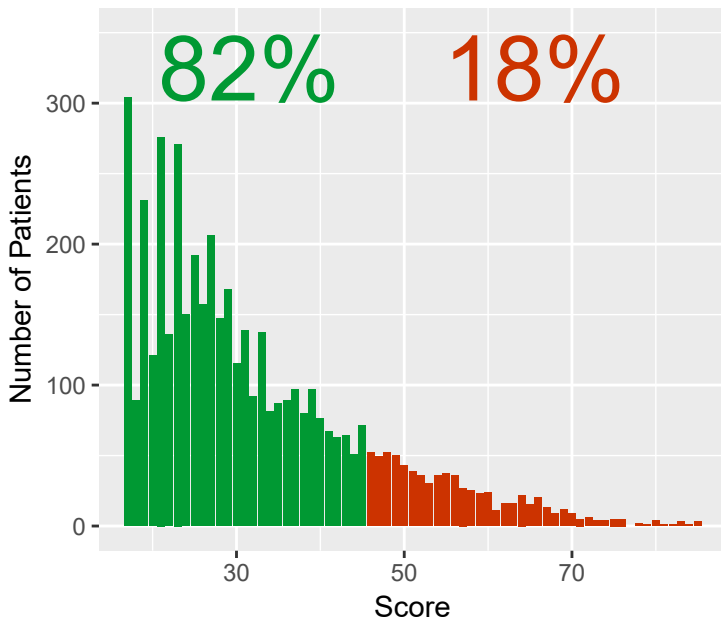

### PCL-C 12 Months

n=3378

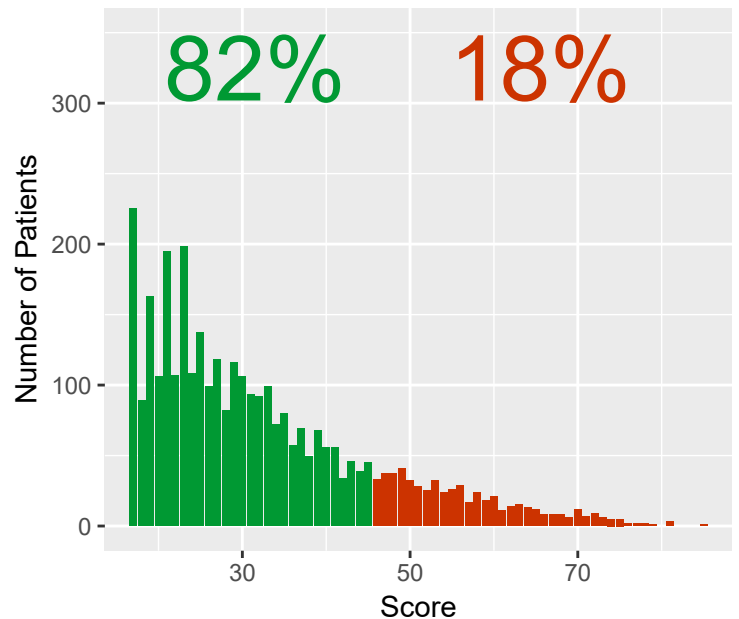

■ No caseness ■ Mild symptoms ■ Moderate symptoms ■ Severe symptoms
