# Supplementary material for: Anxiety, Depression and Post Traumatic Stress Disorder after critical illness: a UK-wide prospective cohort study
Source: PubMed Central journal article supplement (PMC6251214; doi:10.1186/s13054-018-2223-6), 2018-11-23

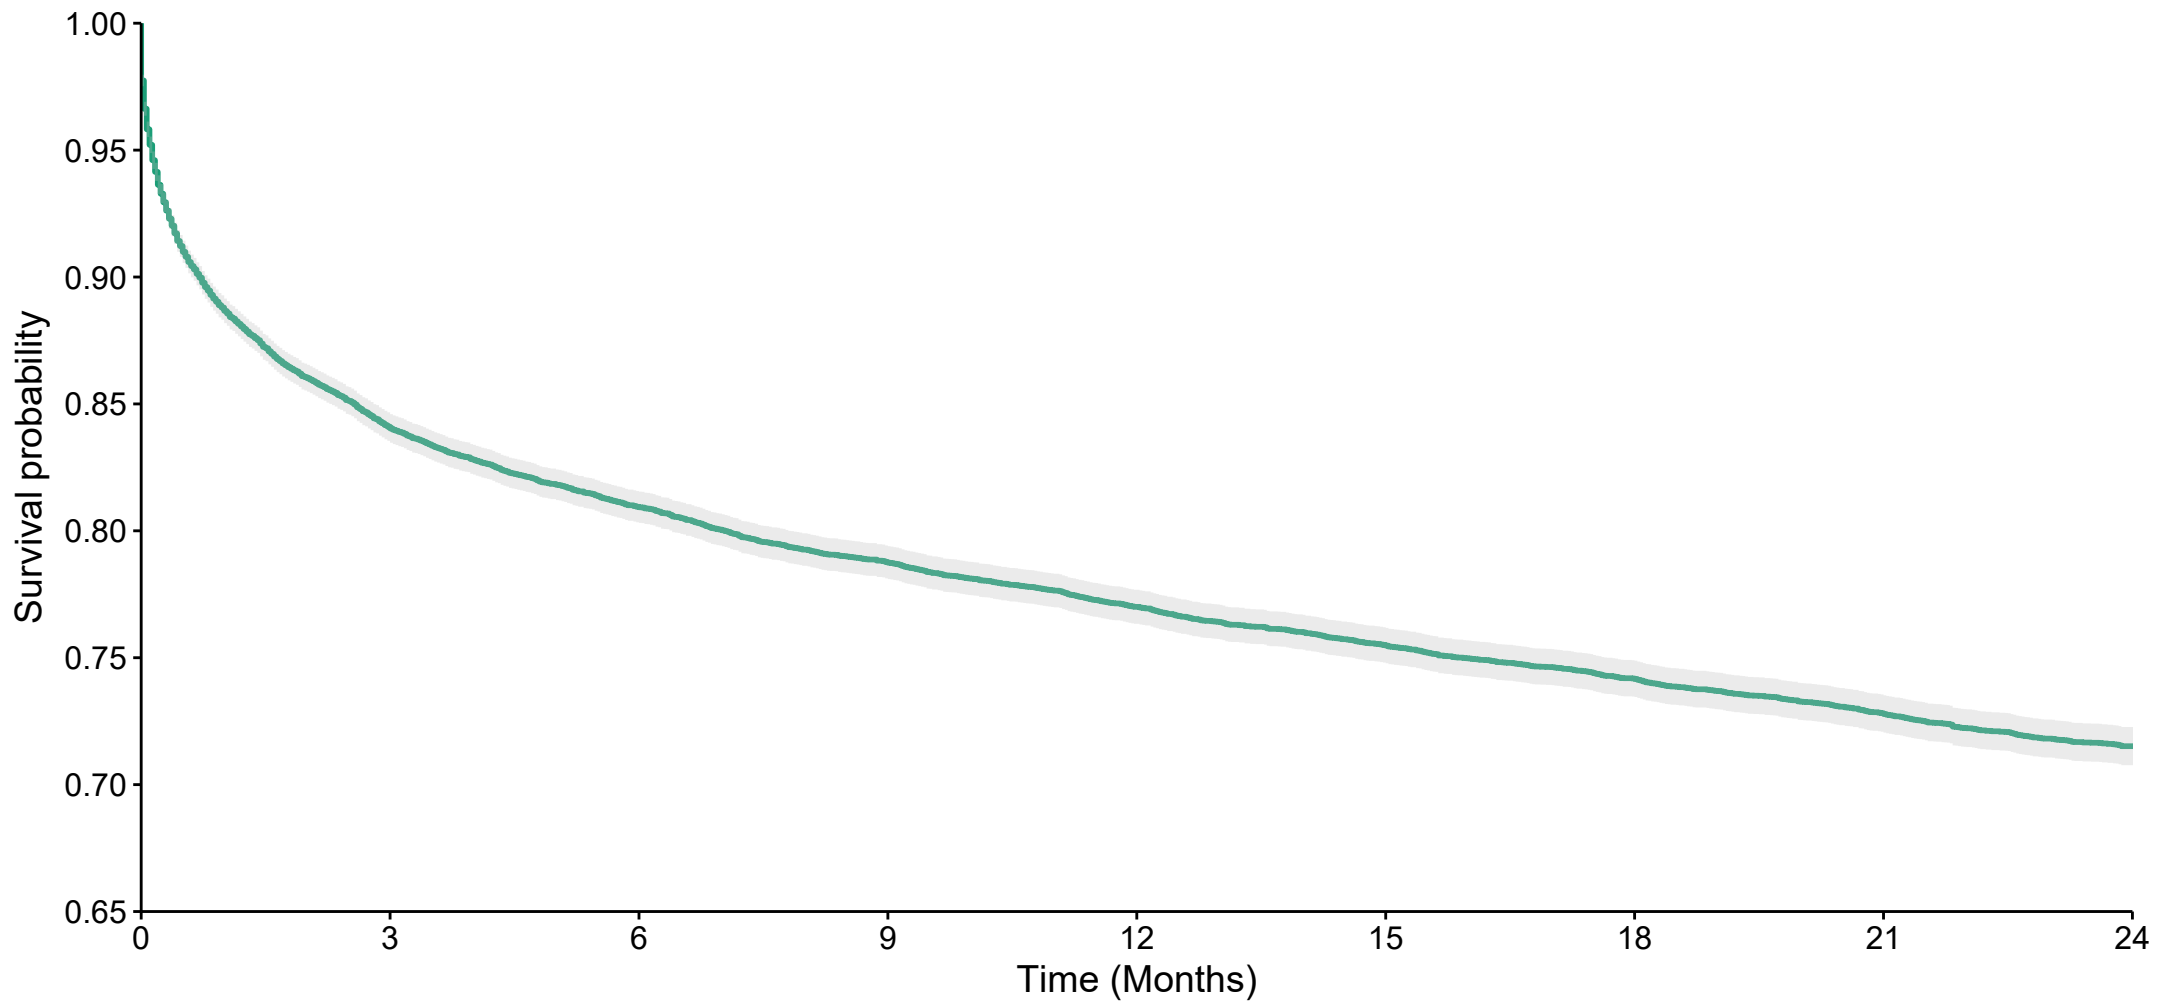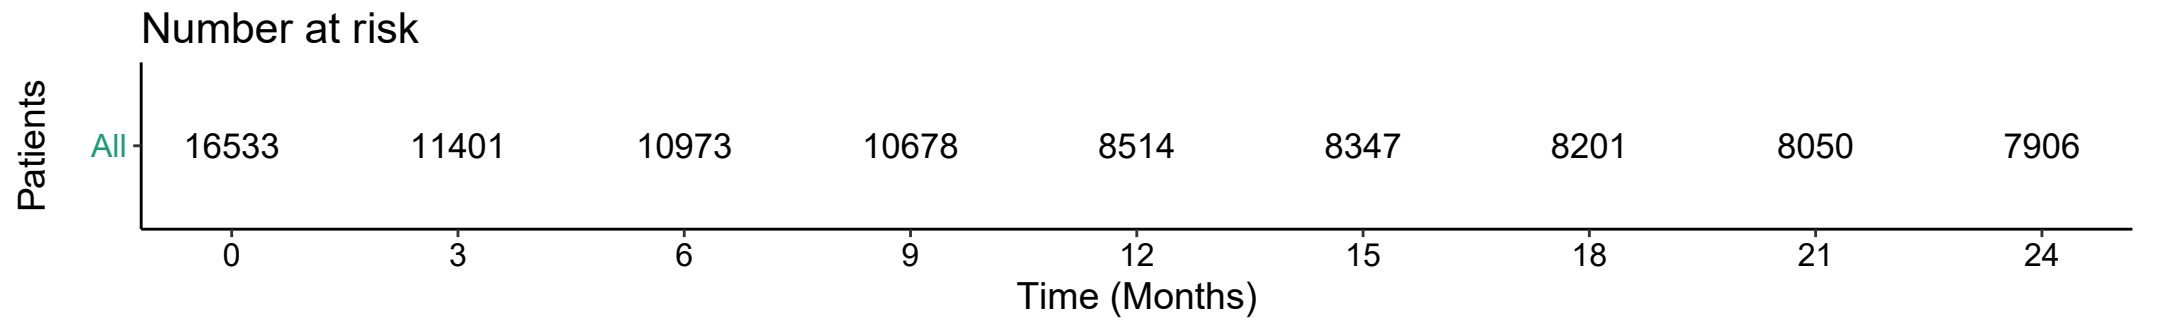

Supplement: 13054_2018_2223_MOESM8_ESM.pdf [file 13054_2018_2223_MOESM8_ESM.pdf]
